# Supplementary material for: Effective hydrogenation of carbonates to produce methanol over a ternary Cu/Zn/Al catalyst
Source: Royal Society of Chemistry journal article supplement (doi:10.1039/d0ra00347f), 2020-01-01
Supplement: d0ra00347f1.pdf [file d0ra00347f1.pdf]

Supporting Information for

## Effective hydrogenation of carbonates to produce methanol over ternary Cu/Zn/Al catalyst

Jiachen Li<sup>a b c d</sup>, Ligu Wang<sup>\* a b c d f</sup>, Xiang Hui<sup>a b c d g</sup>, Chanjuan Zhang<sup>a b c d</sup>, Yan Cao<sup>a b</sup>,  
Shuang Xu<sup>a b</sup>, Peng He<sup>a b</sup> and Huiquan Li<sup>\* a b c d e</sup>

- a. CAS Key Laboratory of Green Process and Engineering, Institute of Process Engineering, Chinese Academy of Sciences, Beijing, 100190, China.*
- b. National Engineering Laboratory for Hydrometallurgical Cleaner Production Technology, Institute of Process Engineering, Chinese Academy of Sciences, Beijing, 100190, China.*
- c. Sino-Danish College, University of Chinese Academy of Sciences, Beijing, 100049, China.*
- d. Sino-Danish center for Education and Research, University of Chinese Academy of Sciences, Beijing, 10049, China.*
- e. School of Chemical Engineering, University of Chinese Academy of Sciences. Beijing, 10049, China.*
- f. Dalian National Laboratory for Clean Energy, Dalian, 116023, China*
- g. Department of Chemical and Biochemical Engineering, Technical University of Denmark, Building 229, 2800 Kgs. Lyngby.*

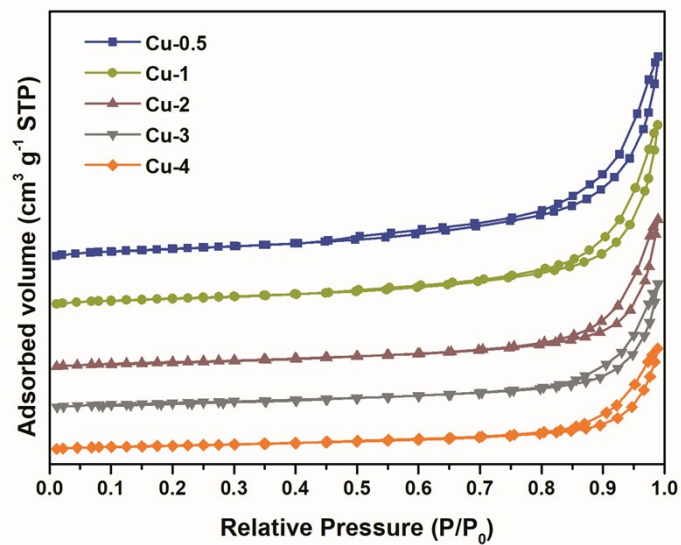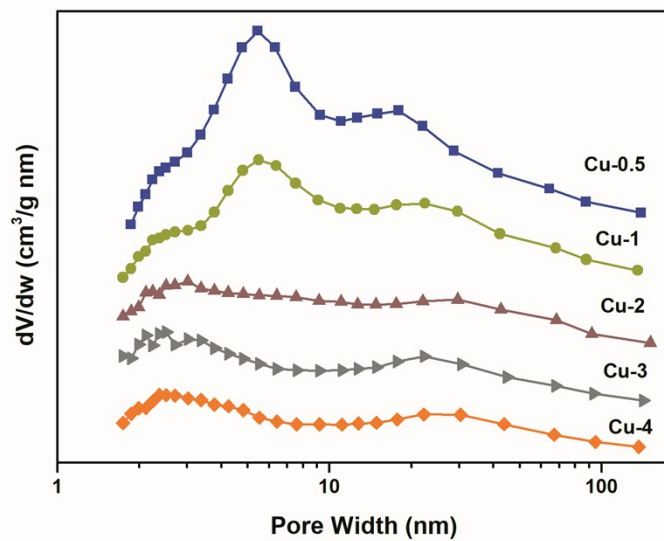

Figure S1. (a)  $N_2$  adsorption-desorption isotherms. (b) Pore size distribution curves from the adsorption branches of catalysts.

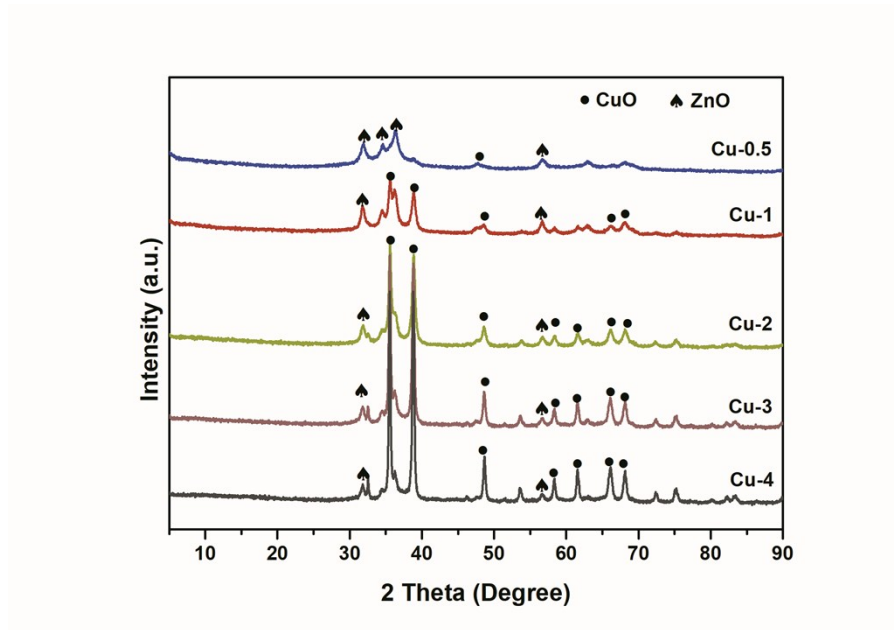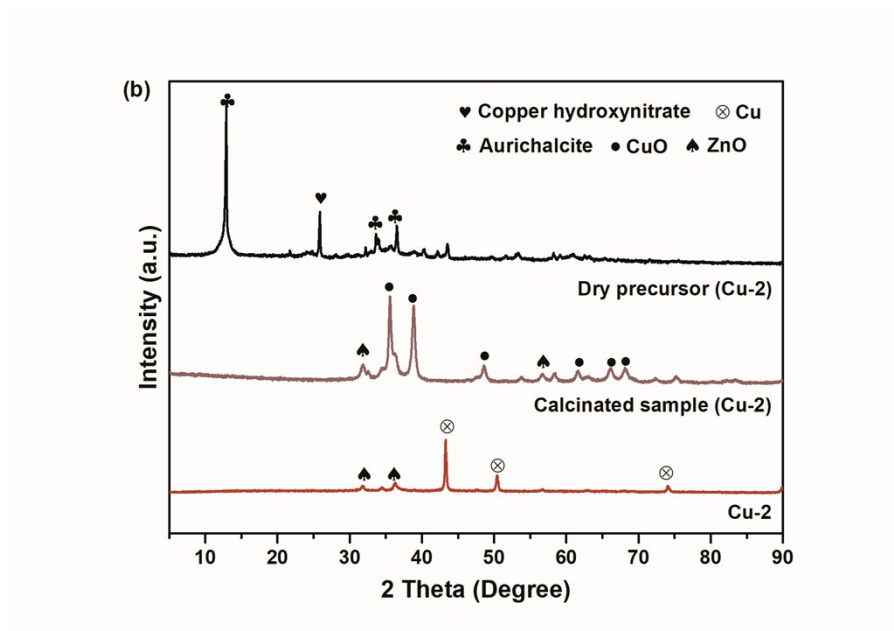

Figure S2. XRD patterns of Cu/Zn/Al-C (a), Cu-2 samples at different preparation stage (b).

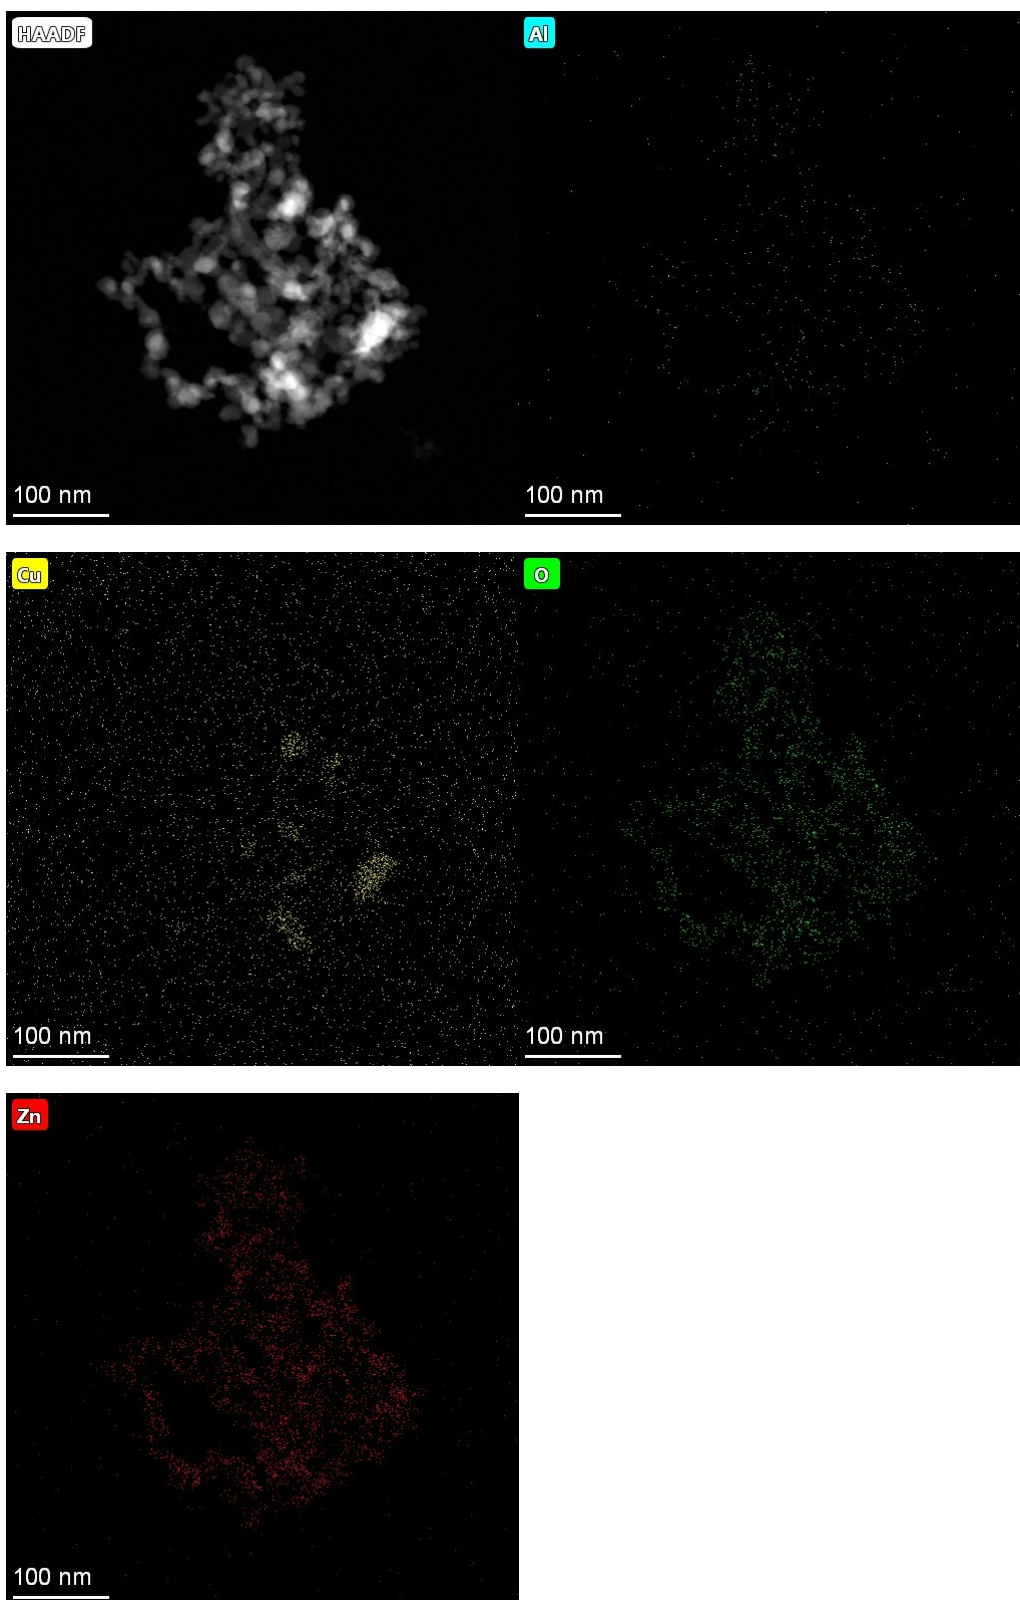

Figure S3. EDX elemental mapping spectra of Cu-2.

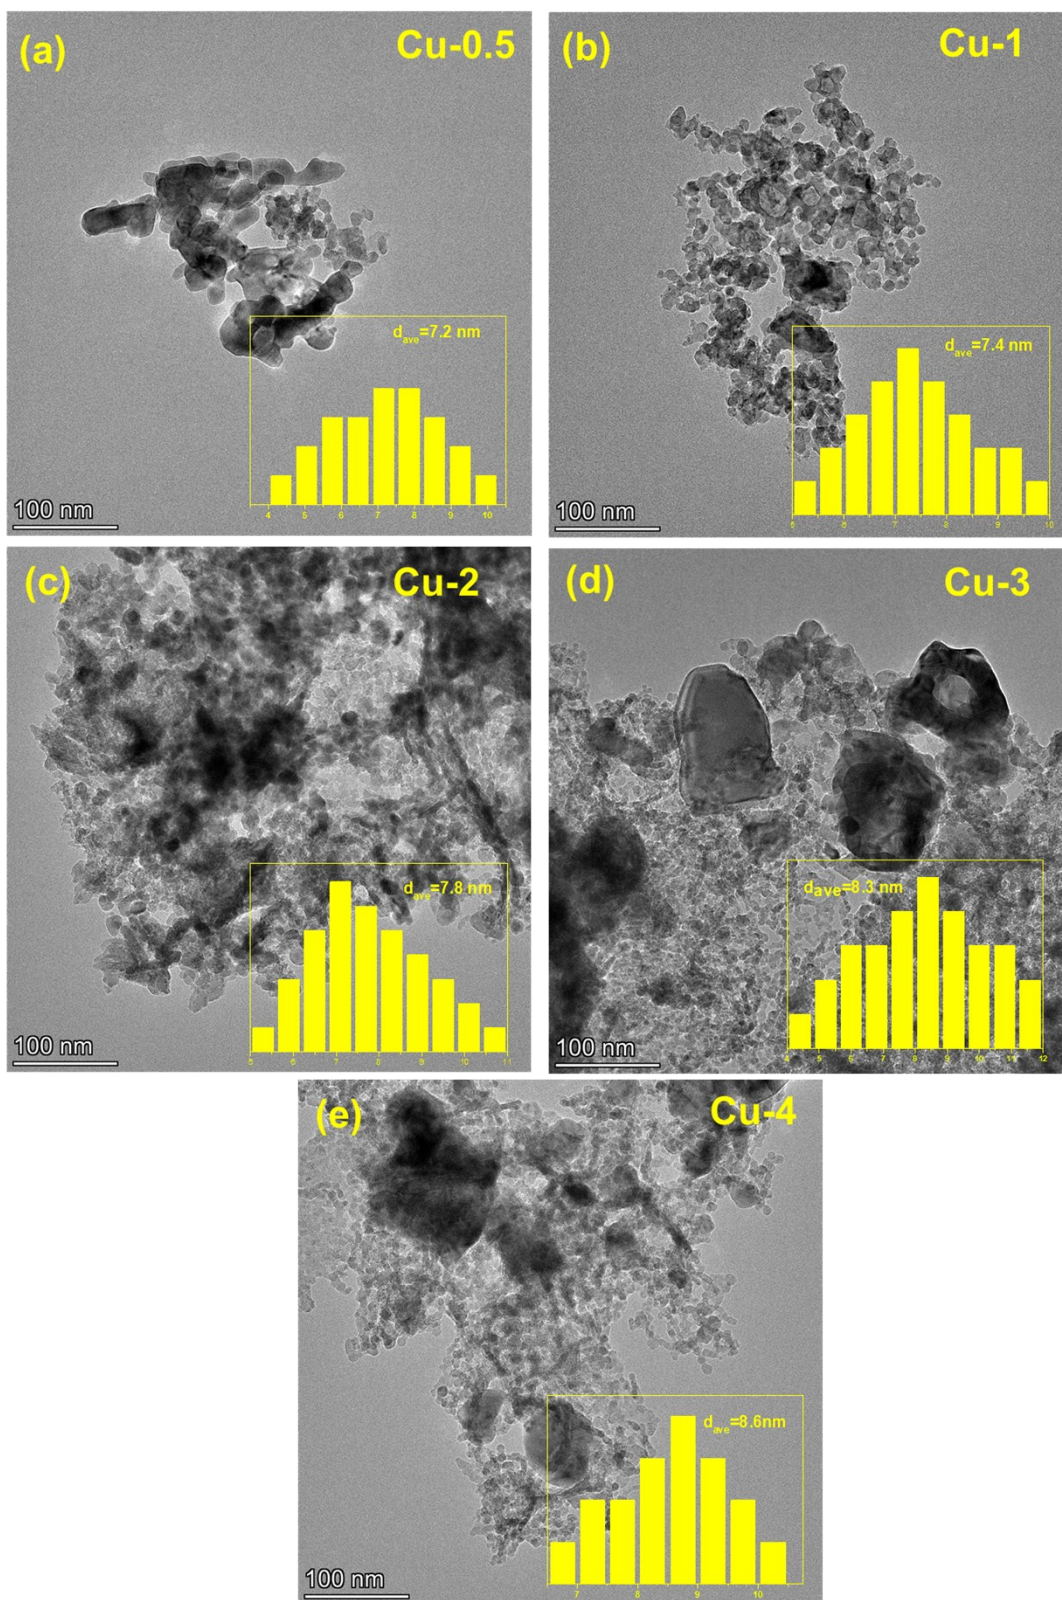

**Figure S4. TEM images of Cu /Zn/Al catalysts.**

**(a) Cu-0.5, (b) Cu-1, (c) Cu-2, (d) Cu-3, (e) Cu-4**

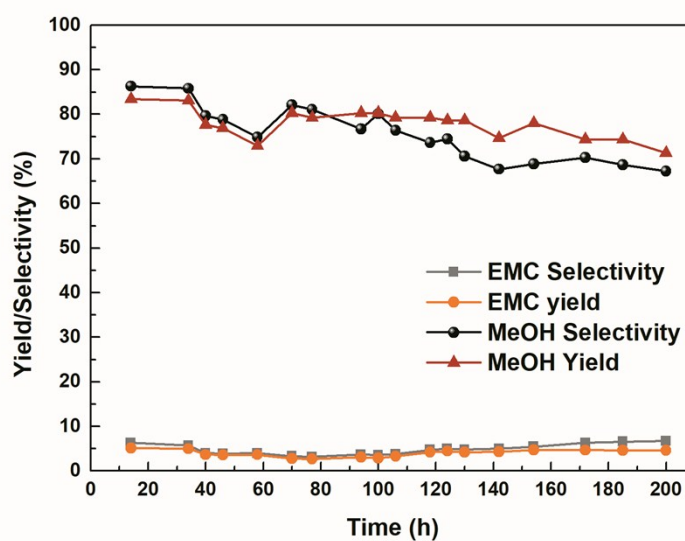

**Figure S5. Hydrogenation performance of Cu-2 catalyst as a function of time on stream for methanol and EMC. Temperature: 200 °C, Liquid hour space velocity (LHSV)~0.2 h<sup>-1</sup>, H<sub>2</sub>/DEC=200, 2.5 MPa.**

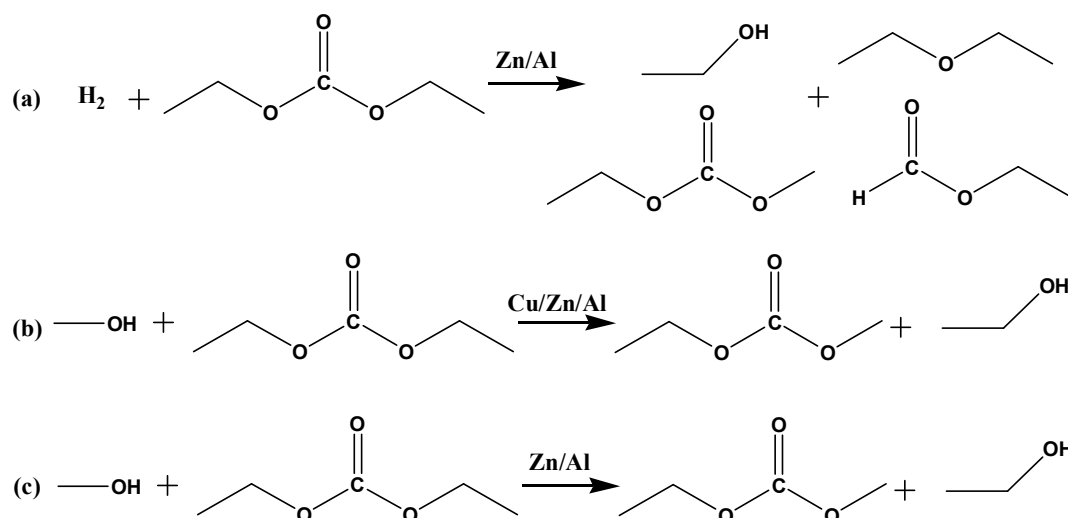

**Scheme S1. Transesterification of methanol and diethyl carbonate over Cu-2 catalyst. Reaction conditions: (a) 10 mmol DEC, 5 MPa H<sub>2</sub>, 10 mL THF and 0.24g Zn/Al catalyst (20 wt% DEC). (b) 10 mmol DEC, 10 mmol methanol, 10 mL THF and 0.24g Cu-2 catalyst (20 wt% DEC). (c) 10mmol DEC, 10 mmol methanol, 10 mL THF and 0.24g Zn/Al catalyst (20 wt% DEC).**

**Table S1. The results of transesterification of methanol and diethyl carbonate over Cu-2 catalyst and Zn/Al catalyst.**

| Catalyst        | Conversion of methanol | Conversion of DEC | Selectivity of EMC |
|-----------------|------------------------|-------------------|--------------------|
| Cu/Zn/Al (Cu-2) | 68.0%                  | 61.1%             | 25.3%              |
| Zn/Al           | 76.2%                  | 76.9%             | 16.3%              |

Zn/Al catalyst was prepared as the similar way as the Cu-2 catalyst with the mole ratio of Zn to Al of 1:1. Reaction conditions: the transesterification reaction was carried out at 200 °C, both the dosage of DEC and methanol are 10 mmol in the solvent of 10 mL THF and 20 wt% catalyst (based on the DEC).

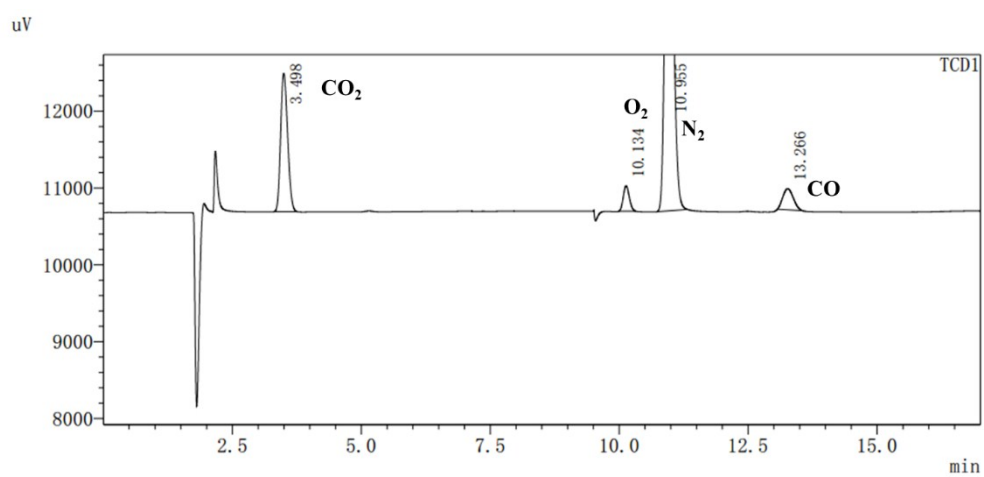

**Figure S6. The GC traces of the gas contents of DEC hydrogenation after the reaction.**
